# Supplementary material for: A novel method for expansion and differentiation of mouse tracheal epithelial cells in culture
Source: PubMed Central journal article supplement (PMC5943313; doi:10.1038/s41598-018-25799-6), 2018-05-09
Supplement: 41598_2018_25799_MOESM1_ESM.pdf [file 41598_2018_25799_MOESM1_ESM.pdf]

1 A novel method for expansion and  
2 differentiation of mouse tracheal epithelial  
3 cells in culture

4 Evelien Eenjes<sup>1,2</sup>, Tinne C.J. Mertens<sup>1,3,4</sup>, Marjon J. Buscop-van Kempen<sup>2</sup>, Yolanda van Wijck<sup>3</sup>,  
5 Christian Taube<sup>3,5</sup>, Robbert J. Rottier<sup>2,6</sup> and Pieter S. Hiemstra<sup>3,6</sup>

6 <sup>1</sup> Authors contributed equally

7 <sup>2</sup> Department of Pediatric Surgery, Erasmus Medical Center-Sophia Children's Hospital, Rotterdam, The Netherlands

8 <sup>3</sup> Department of Pulmonology, Leiden University Medical Center, Leiden, The Netherlands

9 <sup>4</sup> Present address: Department of Biochemistry and Molecular Biology, The University of Texas Health Science Center at  
10 Houston, Houston, Texas, USA

11 <sup>5</sup> Present address: Department of Pulmonary Medicine, West German Lung Center, Essen University Hospital, Ruhrlandklinik,  
12 University Duisburg-Essen, Essen, Germany

13 <sup>6</sup> These authors share senior authorship

14

15

16 Supplemental data

17

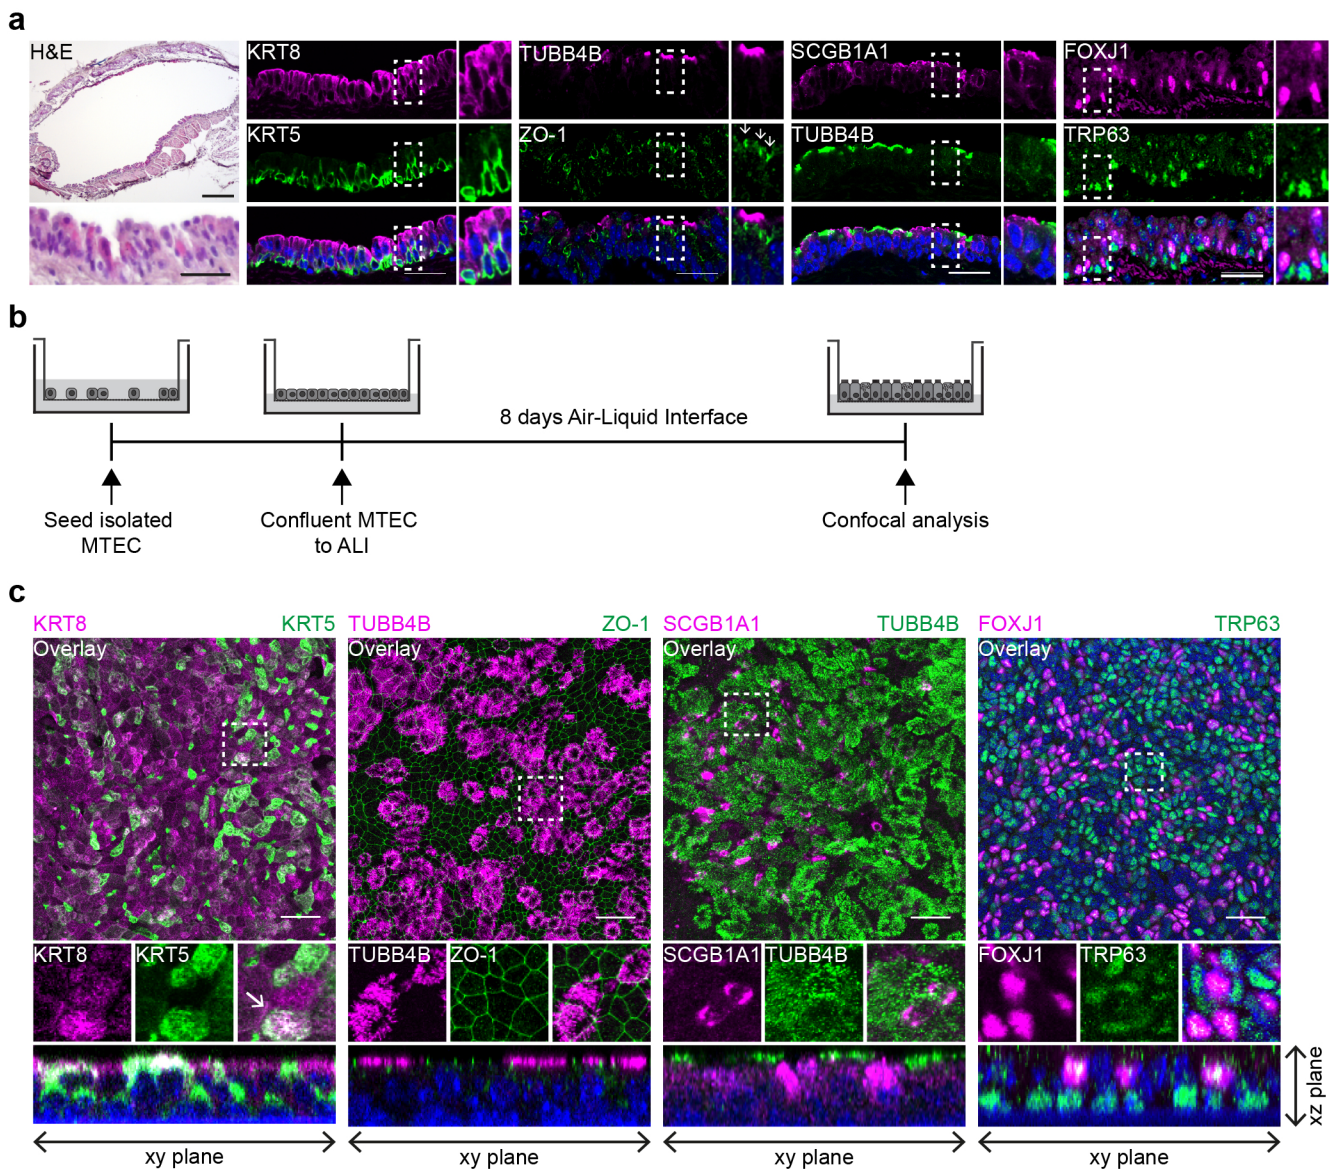

**Supplemental figure 1: MTEC ALI cultures recapitulate the in vivo pseudostratified airway epithelium.**

- A. Hematoxylin and eosin staining of a mouse tracheal sections and immunofluorescence co-staining on tracheal sections with basal cell marker KRT5 and luminal cell marker KRT8, cilia marker TUBB4B with tight junction protein ZO-1 (indicated by the arrows), secretory club cell marker SCGB1A1 with cilia marker TUBB4B and the last panel shows TRP63 positive basal cells with ciliated cell marker FOXJ1. Nuclei are stained with DAPI (blue). Scale bar, 200  $\mu$ m and 30  $\mu$ m.
- B. Schematic representation of ALI culture.
- C. Co-staining of the different epithelial markers on MTEC ALI culture. The arrow marks a basal luminal precursor cell that is both positive for KRT5 and KRT8. Orthogonal view shows a stratified epithelium. Nuclei are stained with DAPI (blue). Scale bar, 30  $\mu$ m.

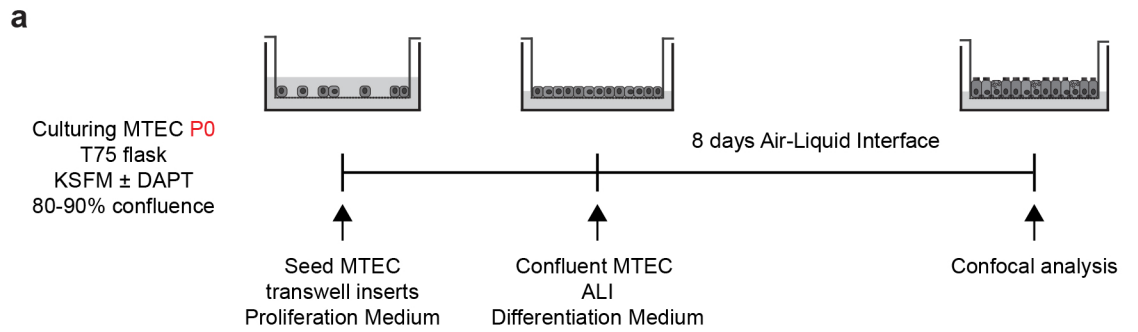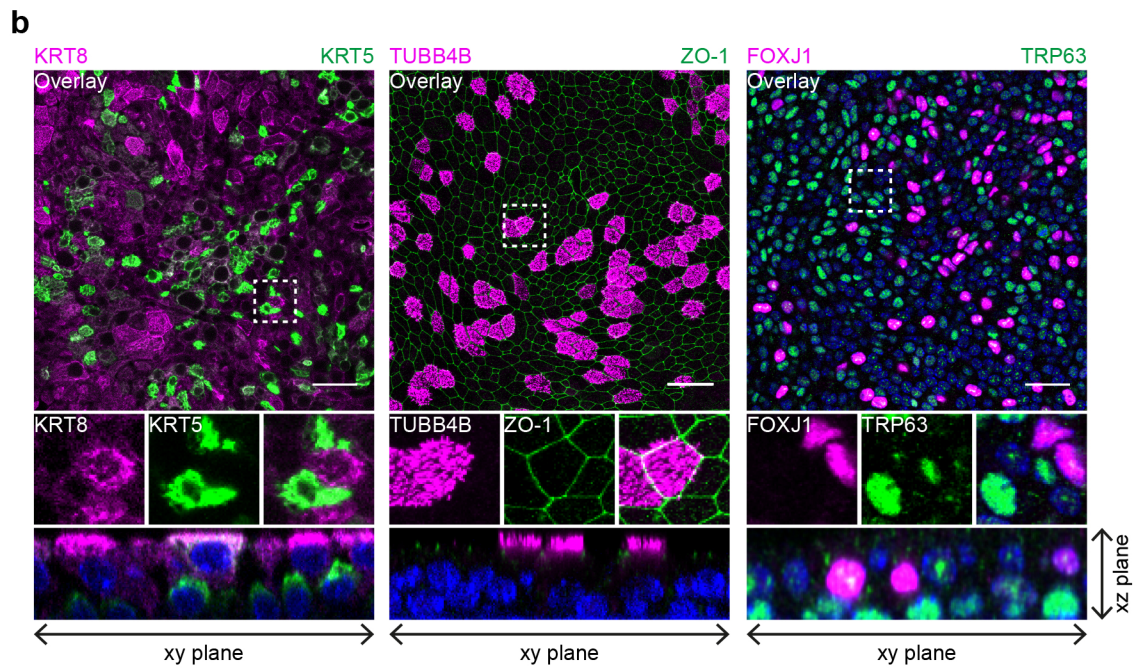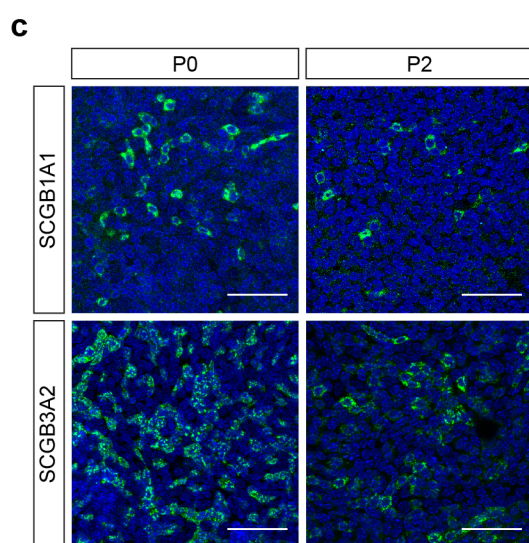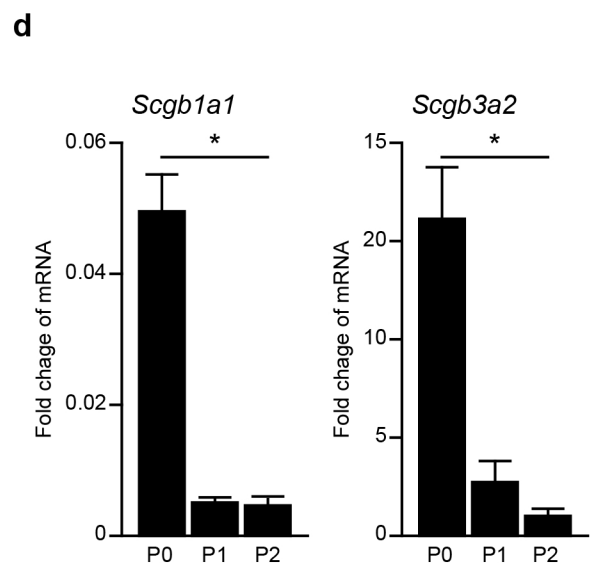

**Supplemental figure 2: Representative images of P1 on inserts.**

A. Schematic representation of ALI culture.

B. Co-staining of different epithelial markers on MTEC passage 1 after 8 days of Air Liquid Interface (ALI) culture. From left to right, inserts were stained with KRT5 for the basal cell layer and differentiation marker KRT8, Ciliated cell marker FOXJ1 with tight junction protein ZO-1, secretory cell marker SCGB1A1 with cilia marker TUBB4B and the last panel shows TRP63 positive basal cells with ciliated cells. Nuclei are stained with DAPI (blue). Scale bar, 30  $\mu$ m.

C. Staining of SCGB1A1 and SCGB3A2 expressing secretory cells in MTEC passage (P) 0 and 2. Scale bar, 50  $\mu$ m.

D. qRT-PCR of *Scgb1a1* and *Scgb3a2* mRNA in MTEC P0 and P2 at 8 days of ALI (mean  $\pm$  SEM). \*  $p < 0.05$  by one-way ANOVA (n=4).

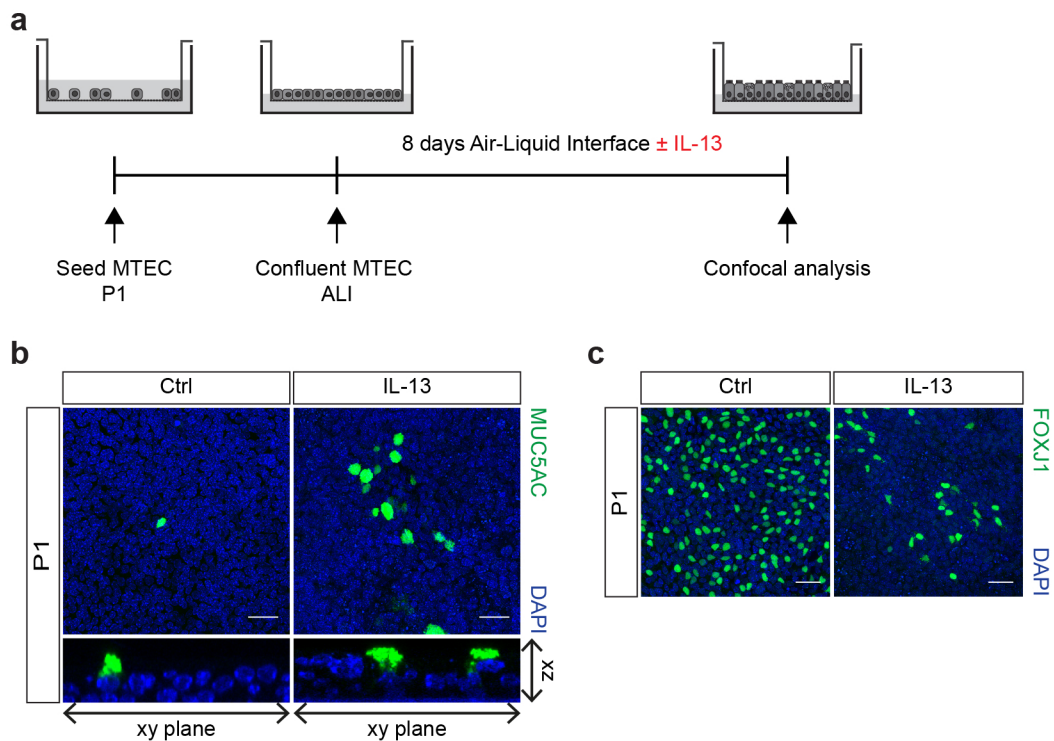

**Supplemental figure 3: IL-13 treatment stimulates the formation of goblet cells in vitro.**

A. Schematic representation of culture protocol.

B. Staining of Mucin 5AC (MUC5AC) expressing goblet cells in MTEC (Passage 1, P1) after 8 days of ALI with or without IL-13 (5 ng/ml). Nuclei are stained with DAPI (blue). Scale bar: 30  $\mu$ M.

C. Staining of FOXJ1 positive ciliated cells after 8 days of ALI with or without IL-13 (5 ng/ml) in P1. Nuclei are stained with DAPI (blue). Scale bar: 30  $\mu$ m.

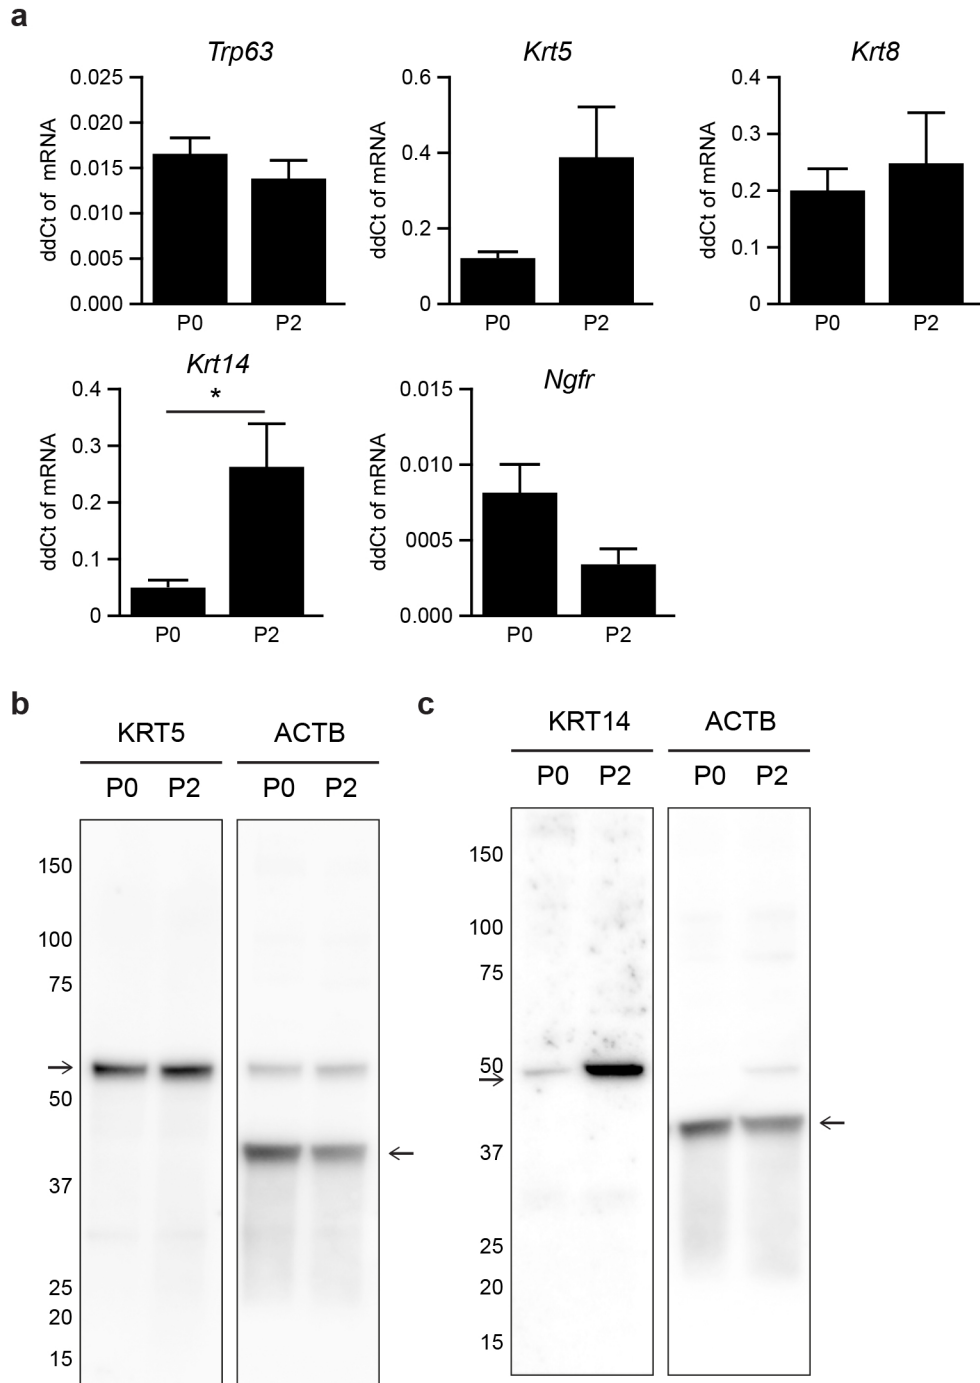

**Supplemental figure 4: Western blot of Krt14 expression on ALI day 0 in P0 and P2**

A. Expression of Trp63, Krt5, Krt8, Krt14 and Ngfr mRNA in MTEC Passage (P) 0 and 2 at day 0 of Air Liquid Interfase (ALI) ALI normalized to Gapdh (mean± SEM). \*  $p < 0.05$  by unpaired t-test (n=4).

B. Full length blots of the cropped blots of fig. 4d. Beta-Actin (ACTB) is used ad loading control and labeled on the same blot as KRT5.

C. Full length blots of the cropped blots of fig. 4f. ACTB is used ad loading control and labeled on the same blot as KRT14.

52 Supplemental table 1: Overview of culture media and supplements

| Medium                                    | Component                | Provider<br>(catalogue number) | Final concentration |
|-------------------------------------------|--------------------------|--------------------------------|---------------------|
| <b><i>KSFM expansion medium</i></b>       | KSFM                     | Gibco (17005034)               |                     |
|                                           | Penicillin               | Lonza (DE17-602e)              | 100 U/ml            |
|                                           | Streptomycin             |                                | 100 µg/ml           |
|                                           | Murine EGF               | Peptotech (315-09)             | 0.025 µg/ml         |
|                                           | Bovine Pituitary Extract | Gibco (13028014)               | 0.03 mg/ml          |
|                                           | Isoproterenol            | Sigma (I-6504)                 | 1 µM                |
|                                           | Y-27632 (add fresh)      | Cayman Chemical (10005583)     | 10 µM               |
| DAPT (add fresh)                          | Sigma (D5942)            | 5 µM                           |                     |
| <b><i>MTEC Basic (*)</i></b>              | DMEM/F12                 | Gibco (1133032)                |                     |
|                                           | Penicillin               | Lonza (DE17-602e)              | 100 U/ml            |
|                                           | Streptomycin             |                                | 100 µg/ml           |
|                                           | NaHCO <sub>3</sub>       | Gibco (25080094)               | 0.03% (w/v)         |
| <b><i>MTEC proliferation medium</i></b>   | MTEC basic               | (*)                            |                     |
|                                           | L-Glutamine              | Gibco (25030081)               | 1.5 mM              |
|                                           | Fetal Calf Serum         | HyClone (SH30071.03)           | 5%                  |
|                                           | ITS-G                    | Gibco (41400045)               | 1x                  |
|                                           | Cholera Toxin            | Sigma (C8052-0.5mg)            | 0.1 µg/ml           |
|                                           | Murine EGF               | Peptotech (315-09)             | 0.025 µg/ml         |
|                                           | Bovine Pituitary Extract | Gibco (13028014)               | 0.03 mg/ml          |
|                                           | Y-27632 (add fresh)      | Cayman Chemical (10005583)     | 10 µM               |
|                                           | Retinoic Acid            | Sigma (R2625-50mg)             | 0.05 µM             |
| <b><i>MTEC differentiation medium</i></b> | MTEC basic               | (*)                            |                     |
|                                           | L-Glutamine              | Gibco (25030081)               | 1.5 mM              |
|                                           | Bovine Serum Albumin     | Gibco (15260037)               | 0.1% (w/v)          |
|                                           | ITS-G                    | Gibco (41400-045)              | 1x                  |
|                                           | Cholera Toxin            | Sigma (C8052-0.5mg)            | 0.025 µg/ml         |
|                                           | Murine EGF               | Peptotech (315-09)             | 0.005 µg/ml         |
|                                           | Bovine Pituitary Extract | Gibco (13028-014)              | 0.03 mg/ml          |
|                                           | Retinoic Acid            | Sigma (R2625-50mg)             | 0.05 µM             |

| <b>Primary Antibody</b>                                    | <b>Provider (Catalogue number)</b>             | <b>Dilution</b> |
|------------------------------------------------------------|------------------------------------------------|-----------------|
| Beta-Tubulin IV                                            | BioGenex, MU178-UC, Mouse monoclonal           | 1:100           |
| SCGB1A1 (CCSP)                                             | From Dr. Barry Stripp, Goat polyclonal         | 1:5000          |
| SCGB1A1 (CCSP,<br>Uteroglobin)                             | Abcam, ab40873, Rabbit polyclonal              | 1:200           |
| UGRP1/SCGB3A2                                              | R&D Systems, af3465, Goat polyclonal           | 1:500           |
| FOXJ1                                                      | eBioscience, 14-9965, Mouse monoclonal         | 1:300           |
| KRT5                                                       | Biologend, Poly19055, Rabbit polyclonal        | 1:500           |
| KRT8                                                       | DSHB, TROMA-I, Rat monoclonal                  | 1:100           |
| MUC5AC                                                     | Abcam, ab3649, Mouse monoclonal                | 1:500           |
| TRP63                                                      | Santa Cruz, sc-8343, Rabbit polyclonal         | 1:50            |
| Zona Occludens 1                                           | Invitrogen, 61-7300, Rabbit polyclonal         | 1:100           |
| KRT14                                                      | EMD Millipore, CBL197, Mouse monoclonal        | 1:100           |
| NGFR                                                       | Promega, Anti-Human P75 pAb, Rabbit polyclonal | 1:200           |
| B-ACTIN                                                    | Cell Signaling, 4967, Rabbit polyclonal        | 1:1000          |
| <b>Secondary Antibody</b>                                  |                                                |                 |
| Alexa Fluor <sup>®</sup> 488, 594<br>Donkey anti Goat IgG  | Jackson ImmunoResearch<br>(111301), (112406)   | 1:500           |
| Alexa Fluor <sup>®</sup> 488, 594<br>Donkey anti Mouse IgG | Jackson ImmunoResearch<br>(112976), (110989)   | 1:500           |
| Alexa Fluor <sup>®</sup> 488, 594                          | Jackson ImmunoResearch                         | 1:500           |

|                                                     |                                    |          |
|-----------------------------------------------------|------------------------------------|----------|
| Donkey anti Rabbit IgG                              | (113254), (113078)                 |          |
| Alexa Fluor <sup>®</sup> 594 Donkey<br>anti Rat IgG | Jackson ImmunoResearch<br>(127426) | 1:500    |
| Anti-mouse HRP<br>conjugated                        | DakoCytomation (P 0447)            | 1:10,000 |
| Anti-rabbit HRP conjugated                          | DakoCytomation (P 0448)            | 1:10,000 |

55



| <b>Primer</b>                                      | <b>Forward primer</b>         | <b>Reverse primer</b>         |
|----------------------------------------------------|-------------------------------|-------------------------------|
| <i>Foxj1</i>                                       | 5'-CAGACCCACCTGGCAGAATTC-3'   | 5'-AAAGGCAGGGTGGATGTGGACT-3'  |
| <i>Scgb1a1</i>                                     | 5'-GCAGCTCAGCTTCTTCGGACA-3'   | 5'-TCCTGGTCTCTTGTGGGAGGG -3'  |
| <i>Scgb3a2</i>                                     | 5'-GTGGTTATTCTGCCACTGCCCTT-3' | 5'-TCGTCCACACACTTCTTCAGTCC-3' |
| <i>Trp63 (<math>\Delta</math>NP63)<sup>1</sup></i> | 5'-GGAAAACAATGCCCAGACTC-3'    | 5'-GATGGAGAGAGGGCATCAAA-3'    |
| <i>Krt5</i>                                        | 5'-TACCAGACCAAGTATGAGGAG-3'   | 5'-TGGATCATTGGTTCATCTCAG-3'   |
| <i>Krt8</i>                                        | 5'-CTCATCAAGAAGGATGTGGAC-3'   | 5'-GAGGAAGTTGATCTCGTCGG-3'    |
| <i>Krt14</i>                                       | 5'-CGGCAAGAGTGAGATTTCTG-3'    | 5'-AGGGATGCTTTCATGCTGAG-3'    |
| <i>Ngfr</i>                                        | 5'-CGCTGACAACCTCATTCTG-3'     | 5'-GCTGTTCCATCTCTTGAAAGC-3'   |
| <i>Gapdh</i>                                       | 5'-CCTGCCAAGTATGATGACAT-3'    | 5'-GTCCTCAGTGTAGCCCAAG-3'     |

57 1. Zhao et al. Yap tunes airway epithelial size and architecture by regulating the identity, maintenance, and self-renewal of stem  
58 cells. Dev Cell 2014

59
